# Supplementary material for: A Glycoengineered Interferon-β Mutein (R27T) Generates Prolonged Signaling by an Altered Receptor-Binding Kinetics
Source: PubMed Central journal article supplement (PMC6353837; doi:10.3389/fphar.2018.01568), 2019-01-24
Supplement: Data_Sheet_1.pdf [file Data_Sheet_1.pdf]

## *Supplementary Material*

### **A Glycoengineered Interferon- $\beta$ Mutein (R27T) Generates Prolonged Signaling by an Altered Receptor-binding Kinetics**

Saehyung Lee, Woo Sung Son, Ho Bin Yang, Nirmal Rajasekaran, Sung-Su Kim, Sungyoul Hong, Joon-Seok Choi, Jun Young Choi, Kyoung Song\*, and Young Kee Shin\*

\* **Correspondence:** Kyoung Song: [sk17@logonebio.org](mailto:sk17@logonebio.org); Young Kee Shin: [ykeeshin@snu.ac.kr](mailto:ykeeshin@snu.ac.kr)

#### **1 Supplementary Materials and Methods**

**Flow cytometry analysis** Daudi, Jurkat, Ramos, THP-1, and MDA-MB-231 cells were used for flow cytometry analysis. Harvested cells were washed with DPBS (Hyclone Laboratories Inc., Logan, UT, USA) and placed in separate tubes at a cell density of  $2.0 \times 10^5$  cells. Antibodies (anti-human IFNAR1, 85228, Thermo Fisher; anti-human IFNAR2, 10359-MM07-A, Sino Biological Inc.) were then used to determine the level of expression of type I IFN receptors in cells, and analyzed using a BD FACSCalibur instrument (BD Biosciences, Franklin Lakes, NJ, USA).

**SPR analysis, western blot, real-time PCR, and competitive binding assays** All experimental methods were performed as described in the Materials and Methods section.

## 2 Supplementary Figures and Tables

### 2.1 Supplementary Figures

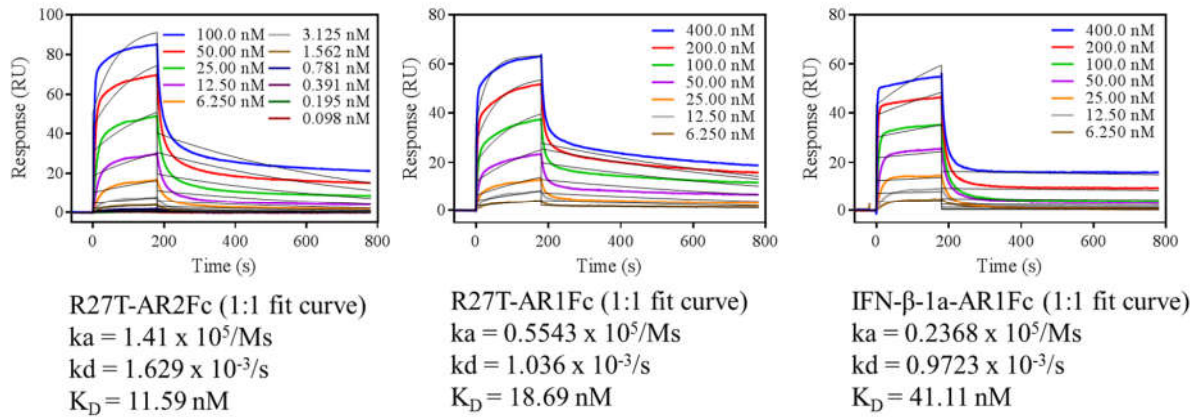

**Supplementary Figure S1.** Fitting of SPR data using the 1:1 Langmuir model. Kinetic analysis of R27T binding to AR2Fc (A) and AR1Fc (B), and IFN- $\beta$ -1a binding to AR1Fc (C). Fusion proteins were evaluated using a BIAcore T200 instrument at 11 (A, 0.098 to 100 nM) and seven (B and C, 6.25 to 400 nM) different concentrations with a CM5 gold chip containing captured anti-human Fc IgG.

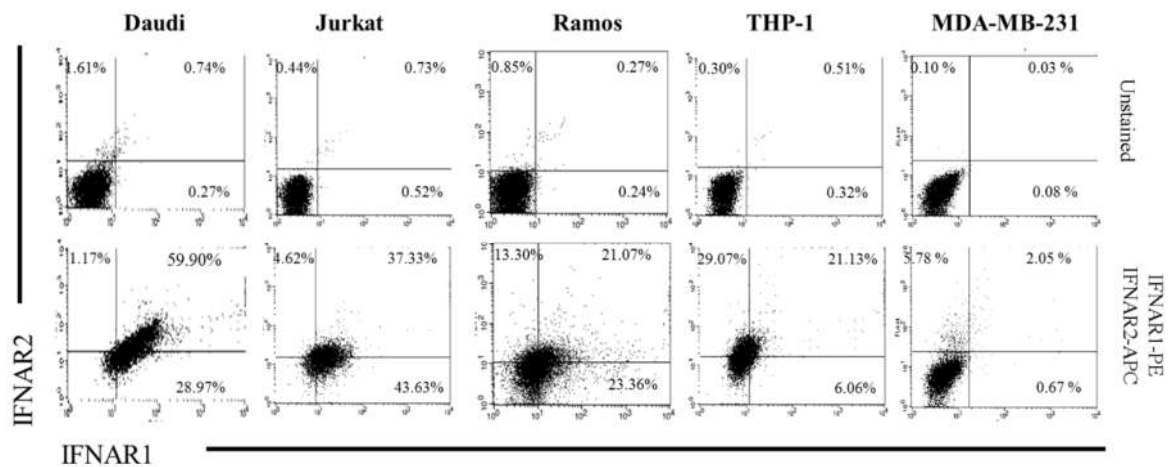

**Supplementary Figure S2.** Screening of the expression of type I IFN receptors on the cell surface in various cell lines by flow cytometry analysis.

**A**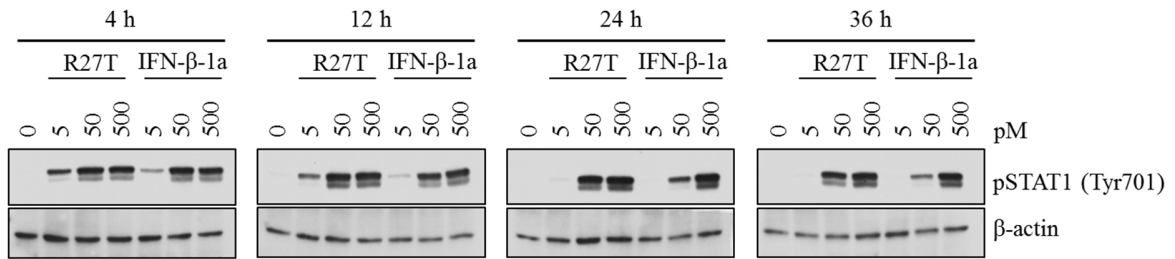**B**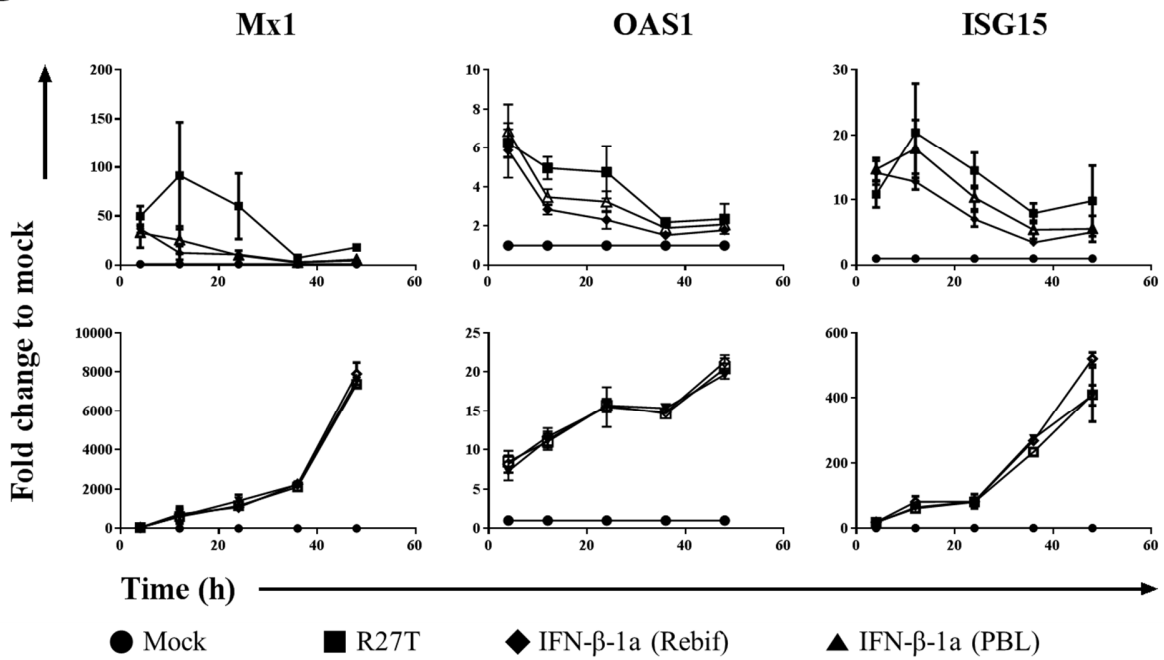

**Supplementary Figure S3.** (A) STAT1 phosphorylation analysis by western blotting. (B) Comparison of IFN-sensitive ISG levels following stimulation with R27T or IFN-β-1as. Mx1, OAS1, and ISG15 mRNA levels in 5 pM (upper) or 500 pM (lower) treated samples were determined at the indicated time points by qRT-PCR analysis.

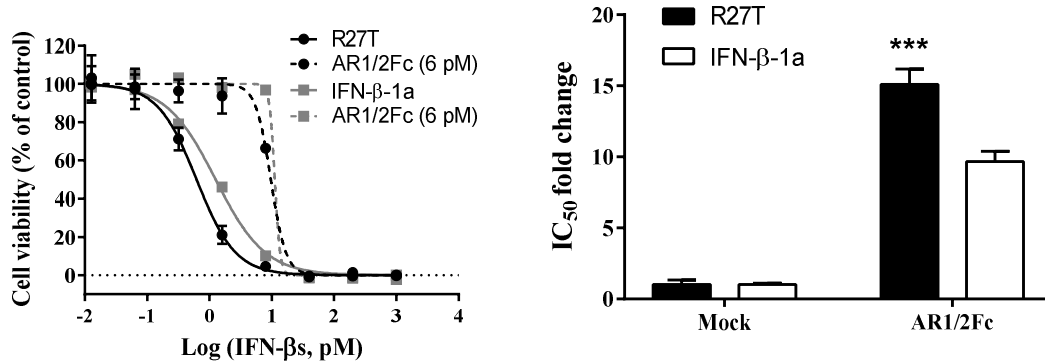

**Supplementary Figure S4.** Displacement of AR1/2Fc (6 pM) by increasing concentrations of R27T or IFN-β-1a on Daudi cells expressing type I IFN receptors. IC<sub>50</sub> values with AR1/2Fc and cell values are means ± s.d. of three independent experiments performed in triplicate. \*\*\* $p < 0.001$  (two-way ANOVA, Bonferroni's multiple comparison *post hoc* tests).

## 2.2 Supplementary Table

**Supplementary Table 1. Oligonucleotide primers used for real-time PCR**

| Gene   | Primer sequence                  | Reference                        |
|--------|----------------------------------|----------------------------------|
| GAPDH  | F: 5'-TCCCTGAGCTGAACGGGAAG-3'    | (Ahmad et al., 2013)             |
|        | R: 5'-GGAGGAGTGGGTGTCGCTGT-3'    |                                  |
| ISG15  | F: 5'-TCCTGGTGAGGAATAACAAGGG-3'  | (Du et al., 2012)                |
|        | R: 5'-GTCAGCCAGAACAGGTCGTC-3'    |                                  |
| Mx1    | F: 5'-TCCCACCCTCTATTACTGAATGG-3' | (Du et al., 2012)                |
|        | R: 5'-GGGAAGGGCAACTCCTGAC-3'     |                                  |
| OAS1   | F: 5'-CATCCGCCTAGTCAAGCACTG-3'   | (Kato et al., 2004)              |
|        | R: 5'-CCACCACCCAAGTTTCCTGTAG-3'  |                                  |
| CXCL10 | F: 5'-TGCTGGGTCTGAGTGGGACT-3'    | (Varona et al., 2005)            |
|        | R: 5'-CCCTATGGCCCTCATTCTCAC-3'   |                                  |
| CCR1   | F: 5'-CTCTTCCTGTTACGCTTCC-3'     | (Martínez-Iglesias et al., 2016) |
|        | R: 5'-GCCTGAAACAGCTTCCACTC-3'    |                                  |
| PLSCR1 | F: 5'-GAATGCTTCTCACCCGGAAA -3'   | (Song et al., 2011)              |
|        | R: 5'-TCCTGGAGGTCCTTGGGAATG-3'   |                                  |

### 3 Reference

- Ahmad, T.a.F.T., Jubri, Z., Rajab, N.F., Rahim, K.A., Yusof, Y.a.M., and Makpol, S. (2013). Gelam honey protects against gamma-irradiation damage to antioxidant enzymes in human diploid fibroblasts. *Molecules* 18, 2200-2211.
- Du, Z., Whitt, M.A., Baumann, J., Garner, J.M., Morton, C.L., Davidoff, A.M., and Pfeffer, L.M. (2012). Inhibition of type I interferon-mediated antiviral action in human glioma cells by the IKK inhibitors BMS-345541 and TPCA-1. *Journal of Interferon & Cytokine Research* 32, 368-377.
- Kato, A., Ogasawara, T., Homma, T., Batchelor, J., Imai, S., Wakiguchi, H., Saito, H., and Matsumoto, K. (2004). CpG oligodeoxynucleotides directly induce CXCR3 chemokines in human B cells. *Biochemical and biophysical research communications* 320, 1139-1147.
- Katoh, H., Hosono, K., Ito, Y., Suzuki, T., Ogawa, Y., Kubo, H., Kamata, H., Mishima, T., Tamaki, H., and Sakagami, H. (2010). COX-2 and prostaglandin EP3/EP4 signaling regulate the tumor stromal proangiogenic microenvironment via CXCL12-CXCR4 chemokine systems. *The American journal of pathology* 176, 1469-1483.
- Martínez-Iglesias, O.A., Alonso-Merino, E., Gómez-Rey, S., Velasco-Martín, J.P., Orozco, R.M., Luengo, E., Martín, R.G., De Cáceres, I.I., Fernández, A.F., and Fraga, M.F. (2016). Autoregulatory loop of nuclear corepressor 1 expression controls invasion, tumor growth, and metastasis. *Proceedings of the National Academy of Sciences* 113, E328-E337.
- Song, G., Fleming, J.-a.G., Kim, J., Spencer, T.E., and Bazer, F.W. (2011). Pregnancy and interferon  $\tau$  regulate DDX58 and PLSCR1 in the ovine uterus during the peri-implantation period. *Reproduction* 141, 127-138.
- Varona, R., Cadenas, V., Gómez, L., Martínez-A, C., and Márquez, G. (2005). CCR6 regulates CD4<sup>+</sup> T-cell-mediated acute graft-versus-host disease responses. *Blood* 106, 18-26.
